# Supplementary material for: Association between fasting glucose and all-cause mortality according to sex and age: a prospective cohort study
Source: PubMed Central journal article supplement (PMC5557842; doi:10.1038/s41598-017-08498-6), 2017-08-15
Supplement: 41598_2017_8498_MOESM1_ESM.pdf [file 41598_2017_8498_MOESM1_ESM.pdf]

## Online-only Supplementary Data

### Association between fasting glucose and all-cause mortality according to sex and age: a prospective cohort study.

**Sang-Wook Yi**, MD, PhD, Department of Preventive Medicine and Public Health, Catholic Kwandong University College of Medicine, Republic of Korea; **Sangkyu Park**, MD, PhD, Department of Biochemistry, Catholic Kwandong University College of Medicine, Republic of Korea; **Yong-Ho Lee**, MD, PhD, Division of Endocrinology and Metabolism, Department of Internal Medicine, Yonsei University College of Medicine, Republic of Korea; **Hyang-Jeong Park**, MSc, Department of Health Promotion, National Health Insurance Service, Republic of Korea; **Beverley Balkau**, PhD, Center for Research in Epidemiology and Population Health (CESP), Team 5 (EpReC, Renal and cardiovascular Epidemiology), INSERM U-1018, France; **Jee-Jeon Yi**, PhD, Institute for Occupational and Environmental Health, Catholic Kwandong University, Republic of Korea

Correspondence: Sang-Wook Yi, MD, PhD, Department of Preventive Medicine and Public Health, Catholic Kwandong University College of Medicine, Bumil-ro 579, Gangneung, Gangwon-do, 25601, Republic of Korea; Tel: +82-33-649-7468; Fax +82-33-641-1074. e-mail: [flyhigh@cku.ac.kr](mailto:flyhigh@cku.ac.kr)

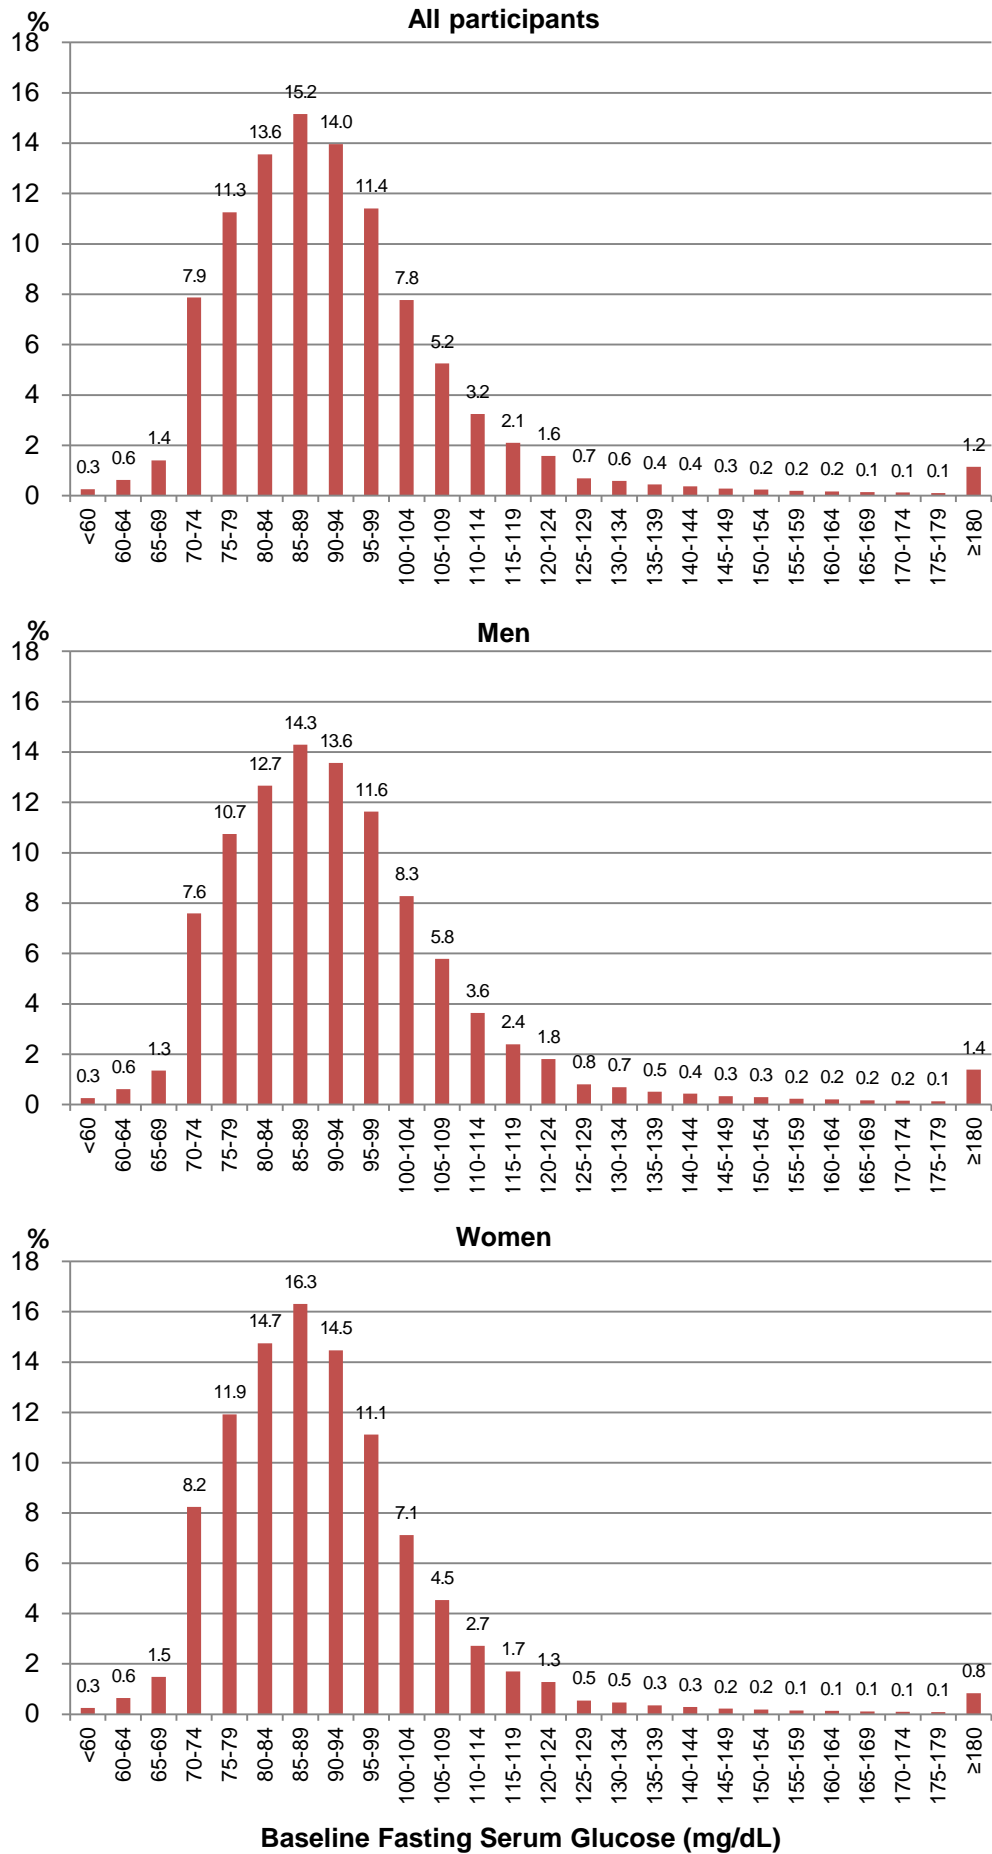

**Figure S1. Distribution of fasting serum glucose concentration in Korean adults.**  
 To convert glucose from mg/dL to mmol/L, multiply by 0.0555.

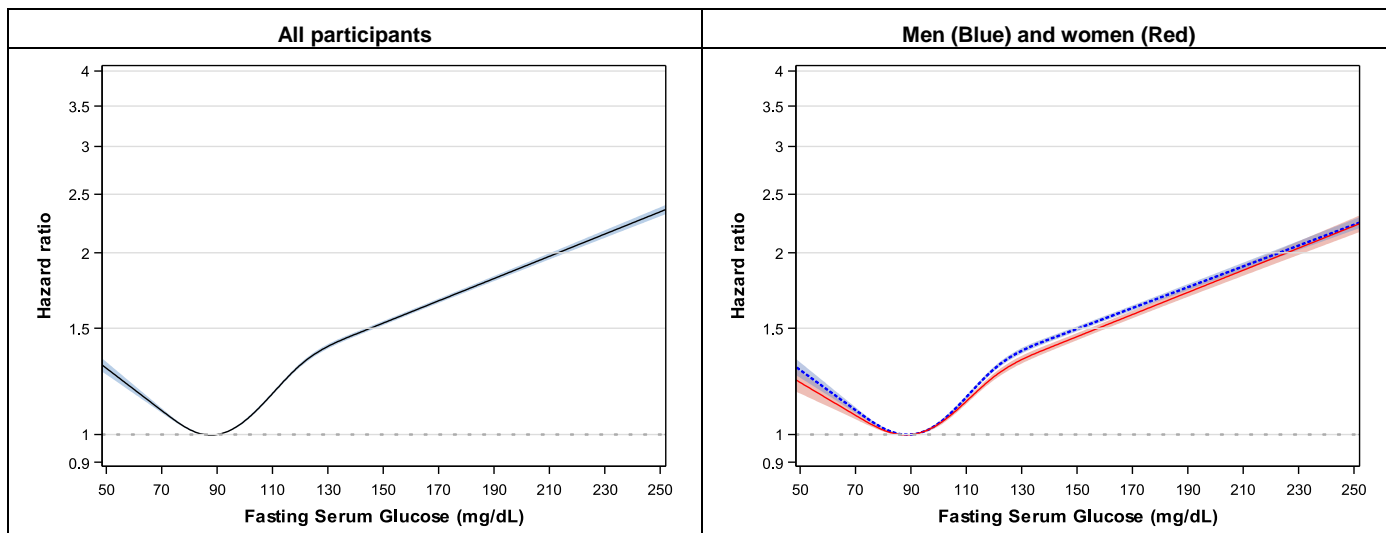

**Figure S2. Hazard ratios<sup>a</sup> for all-cause mortality according to sex by restricted cubic splines of fasting serum glucose with five knots (70, 85, 100, 120, and 140 mg/dL) and 90 mg/dL as a reference in the participants having fasting glucose  $\leq$  300 mg/dL (n=12,430,323).** <sup>a</sup>Hazard ratios and 95% confidence intervals were calculated using Cox hazards models after adjustment for age at baseline (continuous variable), sex (when applicable), smoking status, alcohol use, physical activity, body-mass index, systolic blood pressure, and total cholesterol levels. To convert glucose from mg/dL to mmol/L, multiply by 0.0555.

**Table S1. Characteristics according to age groups in all participants.**

| Characteristics                            | Age group<br>Classification | 18-99 years             | 18-34 years            | 35-44 years            | 45-54 years            | 55-64 years            | 65-74 years          | 75-99 years          |
|--------------------------------------------|-----------------------------|-------------------------|------------------------|------------------------|------------------------|------------------------|----------------------|----------------------|
|                                            |                             | n = 12,455,361<br>n (%) | n = 3,711,950<br>n (%) | n = 3,214,771<br>n (%) | n = 2,633,280<br>n (%) | n = 1,745,729<br>n (%) | n = 913,306<br>n (%) | n = 236,325<br>n (%) |
| Age, years                                 | Mean (SD)                   | 44.0 ±14.1              | 28.0 ±3.9              | 40.0 ±2.8              | 49.3 ±2.9              | 59.6 ±2.9              | 68.9 ±2.7            | 79.1 ±3.5            |
| Fasting serum glucose, mg/dL               | Mean (SD)                   | 93.4 ±27.5              | 87.9 ±21.0             | 92.7 ±26.1             | 95.8 ±29.4             | 98.5 ±32.2             | 99.7 ±33.7           | 101.4 ±35.2          |
| BMI, kg/m <sup>2</sup>                     | Mean (SD)                   | 23.5 ±3.2               | 22.5 ±3.3              | 23.7 ±3.0              | 24.1 ±2.9              | 24.2 ±3.0              | 23.6 ±3.2            | 22.6 ±3.3            |
| Systolic blood pressure, mmHg              | Mean (SD)                   | 123.9 ±17.2             | 118.6 ±13.6            | 121.2 ±15.3            | 125.2 ±17.4            | 130.7 ±18.9            | 134.3 ±19.8          | 137.3 ±21.0          |
| Total cholesterol, mg/dL                   | Mean (SD)                   | 194.0 ±48.7             | 181.7 ±41.3            | 193.2 ±45.3            | 201.6 ±50.0            | 205.0 ±54.2            | 202.7 ±58.3          | 198.6 ±56.4          |
| Sex                                        | Men                         | 7,090,089 (56.9)        | 2,279,667 (61.4)       | 2,017,090 (62.7)       | 1,388,966 (52.7)       | 876,433 (50.2)         | 424,218 (46.4)       | 103,715 (43.9)       |
|                                            | Women                       | 5,365,272 (43.1)        | 1,432,283 (38.6)       | 1,197,681 (37.3)       | 1,244,314 (47.3)       | 869,296 (49.8)         | 489,088 (53.6)       | 132,610 (56.1)       |
| Smoking status                             | Current smoker              | 3,565,515 (28.6)        | 1,337,791 (36.0)       | 1,046,036 (32.5)       | 642,111 (24.4)         | 344,068 (19.7)         | 157,855 (17.3)       | 37,654 (15.9)        |
|                                            | Never smoker                | 7,200,954 (57.8)        | 1,886,639 (50.8)       | 1,707,160 (53.1)       | 1,623,778 (61.7)       | 1,176,528 (67.4)       | 638,972 (70.0)       | 167,877 (71.0)       |
|                                            | Former smoker               | 1,061,104 (8.5)         | 266,935 (7.2)          | 317,318 (9.9)          | 245,831 (9.3)          | 138,989 (8.0)          | 72,686 (8.0)         | 19,345 (8.2)         |
|                                            | Missing                     | 627,788 (5.0)           | 220,585 (5.9)          | 144,257 (4.5)          | 121,560 (4.6)          | 86,144 (4.9)           | 43,793 (4.8)         | 11,449 (4.8)         |
| Drinking status                            | Missing                     | 487,379 (3.9)           | 176,647 (4.8)          | 108,904 (3.4)          | 86,368 (3.3)           | 68,339 (3.9)           | 37,006 (4.1)         | 10,115 (4.3)         |
|                                            | Monthly or less             | 5,886,404 (47.3)        | 1,284,852 (34.6)       | 1,361,571 (42.4)       | 1,372,481 (52.1)       | 1,069,585 (61.3)       | 623,335 (68.3)       | 174,580 (73.9)       |
|                                            | 2/month-2/week              | 4,883,807 (39.2)        | 2,019,567 (54.4)       | 1,410,262 (43.9)       | 871,572 (33.1)         | 404,925 (23.2)         | 148,344 (16.2)       | 29,137 (12.3)        |
|                                            | 3-7 days/week               | 1,197,771 (9.6)         | 230,884 (6.2)          | 334,034 (10.4)         | 302,859 (11.5)         | 202,880 (11.6)         | 104,621 (11.5)       | 22,493 (9.5)         |
| Physical activity,<br>At least once a week | No                          | 7,466,247 (59.9)        | 2,229,657 (60.1)       | 1,818,896 (56.6)       | 1,493,778 (56.7)       | 1,087,972 (62.3)       | 646,432 (70.8)       | 189,512 (80.2)       |
|                                            | Yes                         | 4,989,114 (40.1)        | 1,482,293 (39.9)       | 1,395,875 (43.4)       | 1,139,502 (43.3)       | 657,757 (37.7)         | 266,874 (29.2)       | 46,813 (19.8)        |
| Fasting serum glucose, mg/dL               | <65                         | 110,963 (0.9)           | 48,521 (1.3)           | 25,018 (0.8)           | 17,273 (0.7)           | 11,366 (0.7)           | 6,973 (0.8)          | 1,812 (0.8)          |
|                                            | 65-69                       | 174,961 (1.4)           | 74,660 (2.0)           | 41,876 (1.3)           | 28,433 (1.1)           | 17,517 (1.0)           | 9,844 (1.1)          | 2,631 (1.1)          |
|                                            | 70-74                       | 980,137 (7.9)           | 401,221 (10.8)         | 242,981 (7.6)          | 168,615 (6.4)          | 99,996 (5.7)           | 53,618 (5.9)         | 13,706 (5.8)         |
|                                            | 75-79                       | 1,401,383 (11.3)        | 548,646 (14.8)         | 358,856 (11.2)         | 252,736 (9.6)          | 147,503 (8.4)          | 74,874 (8.2)         | 18,768 (7.9)         |
|                                            | 80-84                       | 1,688,724 (13.6)        | 603,698 (16.3)         | 441,780 (13.7)         | 326,532 (12.4)         | 195,371 (11.2)         | 97,651 (10.7)        | 23,692 (10.0)        |
|                                            | 85-89                       | 1,887,899 (15.2)        | 618,895 (16.7)         | 503,226 (15.7)         | 385,090 (14.6)         | 235,529 (13.5)         | 116,744 (12.8)       | 28,415 (12.0)        |

| Characteristics | Age group      | 18-99 years    |        | 18-34 years   |        | 35-44 years   |        | 45-54 years   |        | 55-64 years   |        | 65-74 years |        | 75-99 years |        |
|-----------------|----------------|----------------|--------|---------------|--------|---------------|--------|---------------|--------|---------------|--------|-------------|--------|-------------|--------|
|                 | Classification | n = 12,455,361 |        | n = 3,711,950 |        | n = 3,214,771 |        | n = 2,633,280 |        | n = 1,745,729 |        | n = 913,306 |        | n = 236,325 |        |
|                 |                | n              | (%)    | n             | (%)    | n             | (%)    | n             | (%)    | n             | (%)    | n           | (%)    | n           | (%)    |
|                 | 90-94          | 1,738,336      | (14.0) | 506,822       | (13.7) | 470,033       | (14.6) | 377,961       | (14.4) | 237,037       | (13.6) | 117,856     | (12.9) | 28,627      | (12.1) |
|                 | 95-99          | 1,421,491      | (11.4) | 373,954       | (10.1) | 383,809       | (11.9) | 321,546       | (12.2) | 211,009       | (12.1) | 105,283     | (11.5) | 25,890      | (11.0) |
|                 | 100-104        | 968,673        | (7.8)  | 216,062       | (5.8)  | 257,400       | (8.0)  | 230,668       | (8.8)  | 160,206       | (9.2)  | 83,392      | (9.1)  | 20,945      | (8.9)  |
|                 | 105-109        | 653,838        | (5.2)  | 128,633       | (3.5)  | 168,331       | (5.2)  | 159,438       | (6.1)  | 117,970       | (6.8)  | 62,760      | (6.9)  | 16,706      | (7.1)  |
|                 | 110-117        | 564,899        | (4.5)  | 95,178        | (2.6)  | 137,307       | (4.3)  | 141,044       | (5.4)  | 111,418       | (6.4)  | 62,557      | (6.8)  | 17,395      | (7.4)  |
|                 | 118-125        | 317,825        | (2.6)  | 44,023        | (1.2)  | 71,572        | (2.2)  | 79,480        | (3.0)  | 68,859        | (3.9)  | 41,277      | (4.5)  | 12,614      | (5.3)  |
|                 | 126-139        | 195,850        | (1.6)  | 22,677        | (0.6)  | 40,895        | (1.3)  | 49,825        | (1.9)  | 45,645        | (2.6)  | 28,092      | (3.1)  | 8,716       | (3.7)  |
|                 | 140-169        | 177,790        | (1.4)  | 16,311        | (0.4)  | 35,849        | (1.1)  | 46,274        | (1.8)  | 43,292        | (2.5)  | 27,283      | (3.0)  | 8,781       | (3.7)  |
|                 | 170-199        | 70,377         | (0.6)  | 5,051         | (0.1)  | 14,220        | (0.4)  | 19,384        | (0.7)  | 17,741        | (1.0)  | 10,669      | (1.2)  | 3,312       | (1.4)  |
|                 | ≥200           | 102,215        | (0.8)  | 7,598         | (0.2)  | 21,618        | (0.7)  | 28,981        | (1.1)  | 25,270        | (1.4)  | 14,433      | (1.6)  | 4,315       | (1.8)  |

BMI, body-mass index; SD, standard deviation

To convert glucose from mg/dL to mmol/L, multiply by 0.0555.

To convert cholesterol from mg/dL to mmol/L, multiply by 0.0259.

**Table S2. Mean of the metabolic mediators according to fasting serum glucose.**

| Age group, years | FSG group, mg/dL | Men and women combined |                        |              |                          | Men       |                        |              |                          | Women   |                        |              |                          |
|------------------|------------------|------------------------|------------------------|--------------|--------------------------|-----------|------------------------|--------------|--------------------------|---------|------------------------|--------------|--------------------------|
|                  |                  | n                      | BMI, kg/m <sup>2</sup> | SBP, mmHg    | Total cholesterol, mg/dL | n         | BMI, kg/m <sup>2</sup> | SBP, mmHg    | Total cholesterol, mg/dL | n       | BMI, kg/m <sup>2</sup> | SBP, mmHg    | Total cholesterol, mg/dL |
|                  |                  |                        | Mean (SD)              | Mean (SD)    | Mean (SD)                |           | Mean (SD)              | Mean (SD)    | Mean (SD)                |         | Mean (SD)              | Mean (SD)    | Mean (SD)                |
| 18-99            | <65              | 110,963                | 22.7 (3.1)             | 120.7 (16.3) | 184.3 (43.7)             | 62,538    | 23.1 (3.0)             | 123.5 (15.3) | 184.4 (42.0)             | 48,425  | 22.2 (3.1)             | 117.0 (17.0) | 184.3 (45.8)             |
| all ages         | 65-69            | 174,961                | 22.7 (3.1)             | 120.4 (16.2) | 185.1 (43.3)             | 95,443    | 23.2 (3.0)             | 123.3 (15.1) | 185.5 (41.7)             | 79,518  | 22.2 (3.1)             | 116.9 (16.8) | 184.6 (45.1)             |
|                  | 70-74            | 980,137                | 22.9 (3.1)             | 120.8 (16.2) | 187.0 (44.2)             | 538,065   | 23.4 (3.0)             | 123.5 (15.1) | 187.9 (43.1)             | 442,072 | 22.3 (3.2)             | 117.4 (16.8) | 185.8 (45.5)             |
|                  | 75-79            | 1,401,383              | 23.0 (3.1)             | 121.0 (16.2) | 188.1 (43.8)             | 761,788   | 23.5 (3.0)             | 123.7 (15.1) | 189.1 (42.2)             | 639,595 | 22.4 (3.2)             | 117.7 (16.9) | 186.9 (45.6)             |
|                  | 80-84            | 1,688,724              | 23.1 (3.1)             | 121.5 (16.4) | 189.8 (43.8)             | 897,680   | 23.6 (2.9)             | 124.2 (15.3) | 190.8 (42.7)             | 791,044 | 22.6 (3.2)             | 118.4 (17.0) | 188.7 (44.9)             |
|                  | 85-89            | 1,887,899              | 23.3 (3.1)             | 122.2 (16.5) | 191.7 (44.9)             | 1,013,051 | 23.7 (2.9)             | 124.7 (15.4) | 192.1 (43.2)             | 874,848 | 22.8 (3.2)             | 119.4 (17.3) | 191.1 (46.7)             |
|                  | 90-94            | 1,738,336              | 23.5 (3.1)             | 123.4 (16.7) | 194.1 (45.4)             | 961,999   | 23.8 (2.9)             | 125.4 (15.6) | 194.0 (43.0)             | 776,337 | 23.0 (3.2)             | 120.8 (17.7) | 194.2 (48.2)             |
|                  | 95-99            | 1,421,491              | 23.7 (3.1)             | 124.6 (16.9) | 196.3 (46.0)             | 825,247   | 24.0 (2.9)             | 126.3 (15.8) | 195.6 (43.5)             | 596,244 | 23.3 (3.3)             | 122.3 (18.1) | 197.2 (49.3)             |
|                  | 100-104          | 968,673                | 23.9 (3.1)             | 126.3 (17.3) | 199.1 (55.7)             | 586,708   | 24.1 (3.0)             | 127.5 (16.2) | 197.6 (53.2)             | 381,965 | 23.6 (3.3)             | 124.3 (18.6) | 201.5 (59.3)             |
|                  | 105-109          | 653,838                | 24.1 (3.1)             | 127.7 (17.5) | 201.1 (56.4)             | 410,578   | 24.2 (3.0)             | 128.7 (16.6) | 199.2 (54.1)             | 243,260 | 23.9 (3.4)             | 126.1 (18.9) | 204.3 (59.9)             |
|                  | 110-117          | 564,899                | 24.3 (3.2)             | 129.4 (17.8) | 202.9 (57.7)             | 362,861   | 24.3 (3.0)             | 130.2 (16.9) | 200.6 (54.7)             | 202,038 | 24.2 (3.4)             | 127.9 (19.3) | 207.1 (62.6)             |
|                  | 118-125          | 317,825                | 24.4 (3.2)             | 130.9 (18.2) | 203.9 (57.6)             | 206,899   | 24.4 (3.1)             | 131.5 (17.4) | 201.2 (55.9)             | 110,926 | 24.5 (3.5)             | 129.7 (19.6) | 209.1 (60.4)             |
|                  | 125-139          | 195,850                | 24.6 (3.3)             | 132.4 (18.7) | 205.2 (56.3)             | 129,551   | 24.6 (3.1)             | 132.8 (17.9) | 202.0 (54.3)             | 66,299  | 24.7 (3.5)             | 131.6 (20.1) | 211.5 (59.6)             |
|                  | 140-169          | 177,790                | 24.7 (3.3)             | 133.3 (18.9) | 206.5 (58.6)             | 119,162   | 24.6 (3.2)             | 133.6 (18.2) | 203.1 (57.4)             | 58,628  | 24.8 (3.5)             | 132.6 (20.2) | 213.4 (60.4)             |
|                  | 170-199          | 70,377                 | 24.8 (3.3)             | 133.8 (19.0) | 208.6 (60.5)             | 48,392    | 24.7 (3.2)             | 134.1 (18.5) | 205.3 (59.0)             | 21,985  | 25.0 (3.6)             | 133.0 (20.2) | 215.9 (63.2)             |
|                  | ≥200             | 102,215                | 24.6 (3.3)             | 133.6 (19.4) | 218.0 (88.1)             | 70,127    | 24.5 (3.2)             | 133.9 (18.8) | 214.9 (84.0)             | 32,088  | 24.7 (3.5)             | 132.9 (20.6) | 225.0 (96.0)             |

BMI, body-mass index; FSG, fasting serum glucose; SBP, systolic blood pressure; SD, standard deviation  
 To convert glucose from mg/dL to mmol/L, multiply by 0.0555.

**Table S3. Mean and median of the fasting serum glucose (mg/dL) (Including numerical version of Figure 1).**

| Age, years | Men and women |        |       |        | Men       |        |       |        | Women     |        |       |        | Sex difference <sup>a</sup> |      |
|------------|---------------|--------|-------|--------|-----------|--------|-------|--------|-----------|--------|-------|--------|-----------------------------|------|
|            | n             | Median | Mean  | (SD)   | n         | Median | Mean  | (SD)   | n         | Median | Mean  | (SD)   | Median                      | Mean |
| 18-99      | 12,455,361    | 89     | 93.4  | (27.5) | 7,090,089 | 90     | 94.7  | (28.8) | 5,365,272 | 88     | 91.7  | (25.6) | 2                           | 3.0  |
| 18-19      | 50,079        | 84     | 85.7  | (19.2) | 10,434    | 84     | 85.4  | (15.1) | 39,645    | 84     | 85.8  | (20.2) | 0                           | -0.4 |
| 20-21      | 167,615       | 84     | 85.4  | (18.5) | 55,725    | 84     | 85.7  | (19.7) | 111,890   | 84     | 85.3  | (18.0) | 0                           | 0.4  |
| 22-23      | 326,869       | 84     | 85.7  | (18.3) | 111,568   | 84     | 86.1  | (19.8) | 215,301   | 84     | 85.5  | (17.4) | 0                           | 0.6  |
| 24-25      | 495,402       | 85     | 86.2  | (19.3) | 206,009   | 85     | 87.1  | (19.6) | 289,393   | 84     | 85.5  | (19.0) | 1                           | 1.6  |
| 26-27      | 564,398       | 85     | 86.8  | (19.5) | 321,754   | 86     | 87.8  | (19.8) | 242,644   | 84     | 85.5  | (18.9) | 2                           | 2.3  |
| 28-29      | 617,749       | 86     | 87.8  | (20.4) | 430,135   | 87     | 88.7  | (20.7) | 187,614   | 84     | 85.8  | (19.7) | 3                           | 2.9  |
| 30-31      | 607,008       | 87     | 88.9  | (21.9) | 456,018   | 87     | 89.8  | (22.6) | 150,990   | 85     | 86.3  | (19.1) | 2                           | 3.5  |
| 32-33      | 583,368       | 88     | 89.9  | (23.3) | 453,377   | 88     | 90.7  | (23.9) | 129,991   | 85     | 87.0  | (21.2) | 3                           | 3.7  |
| 34-35      | 540,608       | 88     | 91.0  | (24.0) | 421,081   | 89     | 91.9  | (24.9) | 119,527   | 86     | 87.7  | (20.4) | 3                           | 4.2  |
| 36-37      | 504,017       | 89     | 91.9  | (25.4) | 390,691   | 90     | 93.0  | (26.3) | 113,326   | 86     | 88.3  | (21.6) | 4                           | 4.7  |
| 38-39      | 484,268       | 89     | 92.6  | (26.2) | 370,178   | 90     | 93.8  | (27.3) | 114,090   | 87     | 88.7  | (22.0) | 3                           | 5.1  |
| 40-41      | 761,812       | 89     | 92.6  | (25.8) | 423,900   | 91     | 94.7  | (27.8) | 337,912   | 88     | 89.9  | (22.8) | 3                           | 4.7  |
| 42-43      | 738,803       | 90     | 93.4  | (26.5) | 412,301   | 91     | 95.7  | (28.9) | 326,502   | 88     | 90.4  | (22.6) | 3                           | 5.3  |
| 44-45      | 681,315       | 90     | 94.0  | (27.7) | 370,434   | 92     | 96.6  | (30.5) | 310,881   | 89     | 91.0  | (23.4) | 3                           | 5.7  |
| 46-47      | 624,363       | 91     | 94.7  | (28.2) | 333,754   | 92     | 97.5  | (31.0) | 290,609   | 89     | 91.5  | (24.3) | 3                           | 6.0  |
| 48-49      | 557,533       | 91     | 95.3  | (29.0) | 288,397   | 93     | 98.2  | (31.8) | 269,136   | 89     | 92.2  | (25.2) | 4                           | 6.1  |
| 50-51      | 488,314       | 91     | 96.1  | (29.9) | 250,952   | 93     | 99.1  | (33.1) | 237,362   | 90     | 93.0  | (25.7) | 3                           | 6.1  |
| 52-53      | 436,421       | 92     | 96.9  | (30.4) | 225,353   | 94     | 99.7  | (33.2) | 211,068   | 90     | 94.0  | (26.7) | 4                           | 5.6  |
| 54-55      | 430,571       | 92     | 97.4  | (30.8) | 223,337   | 94     | 99.8  | (33.8) | 207,234   | 91     | 94.7  | (26.9) | 3                           | 5.1  |
| 56-57      | 370,509       | 93     | 97.8  | (31.3) | 186,665   | 94     | 100.3 | (34.4) | 183,844   | 91     | 95.3  | (27.5) | 3                           | 5.0  |
| 58-59      | 327,034       | 93     | 98.3  | (32.1) | 163,686   | 94     | 100.4 | (34.4) | 163,348   | 92     | 96.2  | (29.5) | 2                           | 4.3  |
| 60-61      | 359,246       | 93     | 98.7  | (32.3) | 177,341   | 94     | 100.7 | (34.3) | 181,905   | 92     | 96.7  | (30.2) | 2                           | 3.9  |
| 62-63      | 335,113       | 93     | 99.0  | (32.5) | 161,496   | 94     | 100.8 | (34.4) | 173,617   | 92     | 97.3  | (30.6) | 2                           | 3.5  |
| 64-65      | 298,159       | 93     | 99.2  | (33.3) | 143,642   | 94     | 100.7 | (34.6) | 154,517   | 93     | 97.7  | (31.9) | 1                           | 2.9  |
| 66-67      | 257,825       | 93     | 99.3  | (33.5) | 121,774   | 94     | 100.5 | (34.8) | 136,051   | 93     | 98.2  | (32.2) | 1                           | 2.3  |
| 68-69      | 219,300       | 93     | 99.3  | (33.2) | 102,337   | 94     | 100.2 | (33.9) | 116,963   | 93     | 98.6  | (32.5) | 1                           | 1.7  |
| 70-71      | 170,418       | 94     | 99.8  | (34.1) | 77,587    | 94     | 100.2 | (34.5) | 92,831    | 93     | 99.4  | (33.8) | 1                           | 0.8  |
| 72-73      | 130,783       | 94     | 99.9  | (33.9) | 57,070    | 94     | 100.0 | (34.3) | 73,713    | 94     | 99.9  | (33.5) | 0                           | 0.1  |
| 74-75      | 103,685       | 94     | 100.3 | (33.8) | 44,964    | 94     | 99.9  | (33.8) | 58,721    | 94     | 100.7 | (33.8) | 0                           | -0.8 |
| 76-77      | 75,978        | 94     | 100.8 | (35.4) | 33,083    | 94     | 100.2 | (35.1) | 42,895    | 94     | 101.2 | (35.7) | 0                           | -0.9 |
| 78-79      | 53,483        | 94     | 101.1 | (34.3) | 23,982    | 94     | 100.5 | (33.6) | 29,501    | 95     | 101.6 | (34.8) | -1                          | -1.0 |
| 80-81      | 39,643        | 94     | 101.3 | (35.9) | 17,658    | 94     | 100.8 | (37.1) | 21,985    | 95     | 101.7 | (34.9) | -1                          | -0.9 |
| 82-83      | 24,476        | 95     | 101.6 | (34.7) | 10,905    | 94     | 101.0 | (34.4) | 13,571    | 95     | 102.1 | (34.8) | -1                          | -1.1 |
| 84-85      | 13,780        | 95     | 101.4 | (31.5) | 6,165     | 94     | 100.4 | (31.2) | 7,615     | 95     | 102.3 | (31.7) | -1                          | -1.9 |
| 86-99      | 15,416        | 96     | 102.5 | (34.9) | 6,336     | 95     | 101.3 | (33.8) | 9,080     | 96     | 103.4 | (35.7) | -1                          | -2.0 |

SD, standard deviation.

<sup>a</sup> Concentration in men minus concentration in women.

To convert glucose from mg/dL to mmol/L, multiply by 0.0555.

**Table S4. HRs<sup>a</sup> for death associated with fasting glucose, after adjustment for potential risk factors (Including numerical version of Figure 2).**

| sex           | FSG group, mg/dL | Person year | No. of death | ASR <sup>e</sup> | Sex, and age adjusted <sup>b</sup> |                  | Additionally behavioral factors adjusted <sup>c</sup> |                  | Fully adjusted <sup>d</sup> |                  |
|---------------|------------------|-------------|--------------|------------------|------------------------------------|------------------|-------------------------------------------------------|------------------|-----------------------------|------------------|
|               |                  |             |              |                  | p-value                            | HR (95% CI)      | p-value                                               | HR (95% CI)      | p-value                     | HR (95% CI)      |
| Men and Women | <65              | 1,192,954   | 5,635        | 2,064            | <0.001                             | 1.31 (1.27-1.34) | <0.001                                                | 1.26 (1.22-1.29) | <0.001                      | 1.21 (1.18-1.25) |
| Women         | 65-69            | 1,878,971   | 7,503        | 1,871            | <0.001                             | 1.16 (1.14-1.19) | <0.001                                                | 1.13 (1.10-1.16) | <0.001                      | 1.10 (1.07-1.12) |
|               | 70-74            | 10,458,930  | 39,102       | 1,828            | <0.001                             | 1.11 (1.10-1.13) | <0.001                                                | 1.09 (1.07-1.10) | <0.001                      | 1.06 (1.05-1.08) |
|               | 75-79            | 14,945,216  | 53,540       | 1,774            | <0.001                             | 1.07 (1.06-1.08) | <0.001                                                | 1.06 (1.04-1.07) | <0.001                      | 1.04 (1.03-1.05) |
|               | 80-84            | 17,939,000  | 65,942       | 1,697            | <0.001                             | 1.03 (1.02-1.05) | <0.001                                                | 1.02 (1.01-1.04) | 0.018                       | 1.01 (1.00-1.02) |
|               | 85-89            | 19,978,332  | 76,216       | 1,672            | 0.069                              | 1.01 (1.00-1.02) | 0.294                                                 | 1.01 (1.00-1.02) | 0.782                       | 1.00 (0.99-1.01) |
|               | 90-94            | 18,345,353  | 75,204       | 1,657            |                                    | 1.00 (Reference) |                                                       | 1.00 (Reference) |                             | 1.00 (Reference) |
|               | 95-99            | 14,962,321  | 67,675       | 1,659            | 0.007                              | 1.01 (1.00-1.02) | 0.008                                                 | 1.01 (1.00-1.02) | <0.001                      | 1.02 (1.01-1.03) |
|               | 100-104          | 10,155,341  | 53,854       | 1,717            | <0.001                             | 1.05 (1.04-1.06) | <0.001                                                | 1.05 (1.04-1.06) | <0.001                      | 1.06 (1.05-1.07) |
|               | 105-109          | 6,827,745   | 42,071       | 1,767            | <0.001                             | 1.10 (1.09-1.11) | <0.001                                                | 1.10 (1.08-1.11) | <0.001                      | 1.11 (1.10-1.12) |
|               | 110-117          | 5,866,662   | 43,507       | 1,873            | <0.001                             | 1.18 (1.17-1.20) | <0.001                                                | 1.17 (1.16-1.19) | <0.001                      | 1.19 (1.18-1.21) |
|               | 118-125          | 3,276,325   | 30,093       | 1,964            | <0.001                             | 1.27 (1.25-1.28) | <0.001                                                | 1.25 (1.23-1.27) | <0.001                      | 1.27 (1.25-1.29) |
|               | 126-139          | 2,001,263   | 21,310       | 2,081            | <0.001                             | 1.36 (1.34-1.38) | <0.001                                                | 1.34 (1.32-1.36) | <0.001                      | 1.36 (1.34-1.38) |
|               | 140-169          | 1,802,570   | 22,938       | 2,272            | <0.001                             | 1.53 (1.51-1.55) | <0.001                                                | 1.49 (1.47-1.52) | <0.001                      | 1.52 (1.50-1.54) |
|               | 170-200          | 708,388     | 10,236       | 2,498            | <0.001                             | 1.76 (1.72-1.79) | <0.001                                                | 1.71 (1.68-1.75) | <0.001                      | 1.75 (1.71-1.79) |
|               | ≥200             | 1,016,125   | 17,563       | 2,978            | <0.001                             | 2.31 (2.27-2.34) | <0.001                                                | 2.25 (2.21-2.29) | <0.001                      | 2.30 (2.26-2.34) |
| Men           | <65              | 671,180     | 3,920        | 2,771            | <0.001                             | 1.35 (1.31-1.40) | <0.001                                                | 1.29 (1.25-1.33) | <0.001                      | 1.23 (1.19-1.27) |
|               | 65-69            | 1,025,428   | 5,029        | 2,376            | <0.001                             | 1.18 (1.15-1.21) | <0.001                                                | 1.13 (1.10-1.17) | <0.001                      | 1.09 (1.06-1.12) |
|               | 70-74            | 5,753,320   | 26,184       | 2,381            | <0.001                             | 1.13 (1.11-1.15) | <0.001                                                | 1.09 (1.08-1.11) | <0.001                      | 1.06 (1.05-1.08) |
|               | 75-79            | 8,147,381   | 35,271       | 2,307            | <0.001                             | 1.08 (1.07-1.10) | <0.001                                                | 1.06 (1.04-1.07) | <0.001                      | 1.04 (1.02-1.05) |
|               | 80-84            | 9,566,606   | 42,537       | 2,184            | <0.001                             | 1.04 (1.03-1.05) | <0.001                                                | 1.03 (1.01-1.04) | 0.121                       | 1.01 (1.00-1.02) |
|               | 85-89            | 10,756,986  | 48,987       | 2,140            | 0.046                              | 1.01 (1.00-1.03) | 0.317                                                 | 1.01 (0.99-1.02) | 0.655                       | 1.00 (0.98-1.01) |
|               | 90-94            | 10,188,727  | 48,506       | 2,117            |                                    | 1.00 (Reference) |                                                       | 1.00 (Reference) |                             | 1.00 (Reference) |
|               | 95-99            | 8,714,867   | 44,012       | 2,101            | 0.430                              | 1.01 (0.99-1.02) | 0.324                                                 | 1.01 (0.99-1.02) | 0.063                       | 1.01 (1.00-1.03) |
|               | 100-104          | 6,165,166   | 35,683       | 2,194            | <0.001                             | 1.04 (1.03-1.06) | <0.001                                                | 1.05 (1.03-1.06) | <0.001                      | 1.06 (1.04-1.07) |
|               | 105-109          | 4,295,599   | 27,980       | 2,253            | <0.001                             | 1.09 (1.07-1.11) | <0.001                                                | 1.09 (1.07-1.10) | <0.001                      | 1.11 (1.09-1.12) |
|               | 110-117          | 3,774,615   | 28,958       | 2,368            | <0.001                             | 1.17 (1.15-1.18) | <0.001                                                | 1.16 (1.15-1.18) | <0.001                      | 1.18 (1.16-1.20) |
|               | 118-125          | 2,136,369   | 20,062       | 2,510            | <0.001                             | 1.26 (1.24-1.28) | <0.001                                                | 1.25 (1.23-1.27) | <0.001                      | 1.27 (1.25-1.29) |
|               | 126-139          | 1,326,024   | 14,392       | 2,654            | <0.001                             | 1.36 (1.33-1.39) | <0.001                                                | 1.34 (1.32-1.37) | <0.001                      | 1.37 (1.35-1.40) |
|               | 140-169          | 1,209,792   | 15,741       | 2,905            | <0.001                             | 1.54 (1.51-1.57) | <0.001                                                | 1.50 (1.47-1.53) | <0.001                      | 1.53 (1.50-1.55) |
|               | 170-200          | 487,727     | 7,088        | 3,115            | <0.001                             | 1.73 (1.69-1.77) | <0.001                                                | 1.69 (1.64-1.73) | <0.001                      | 1.72 (1.68-1.76) |
|               | ≥200             | 697,032     | 12,207       | 3,702            | <0.001                             | 2.28 (2.24-2.33) | <0.001                                                | 2.22 (2.17-2.26) | <0.001                      | 2.27 (2.22-2.31) |



| sex   | FSG group,<br>mg/dL | Person year | No. of death | ASR <sup>e</sup> | Sex, and age adjusted <sup>b</sup> |                  | Additionally behavioral factors adjusted <sup>c</sup> |                  | Fully adjusted <sup>d</sup> |                  |
|-------|---------------------|-------------|--------------|------------------|------------------------------------|------------------|-------------------------------------------------------|------------------|-----------------------------|------------------|
|       |                     |             |              |                  | p-value                            | HR (95% CI)      | p-value                                               | HR (95% CI)      | p-value                     | HR (95% CI)      |
| Women | <65                 | 521,774     | 1,715        | 1,358            | <0.001                             | 1.21 (1.15-1.27) | <0.001                                                | 1.18 (1.13-1.24) | <0.001                      | 1.16 (1.11-1.22) |
|       | 65-69               | 853,543     | 2,474        | 1,367            | <0.001                             | 1.14 (1.09-1.18) | <0.001                                                | 1.12 (1.07-1.17) | <0.001                      | 1.10 (1.06-1.15) |
|       | 70-74               | 4,705,611   | 12,918       | 1,274            | <0.001                             | 1.08 (1.06-1.10) | <0.001                                                | 1.07 (1.05-1.09) | <0.001                      | 1.06 (1.04-1.08) |
|       | 75-79               | 6,797,835   | 18,269       | 1,241            | <0.001                             | 1.06 (1.04-1.08) | <0.001                                                | 1.05 (1.03-1.07) | <0.001                      | 1.04 (1.02-1.06) |
|       | 80-84               | 8,372,394   | 23,405       | 1,210            | 0.002                              | 1.03 (1.01-1.05) | 0.008                                                 | 1.02 (1.01-1.04) | 0.045                       | 1.02 (1.00-1.04) |
|       | 85-89               | 9,221,345   | 27,229       | 1,203            | 0.478                              | 1.01 (0.99-1.02) | 0.523                                                 | 1.01 (0.99-1.02) | 0.717                       | 1.00 (0.99-1.02) |
|       | 90-94               | 8,156,627   | 26,698       | 1,196            |                                    | 1.00 (Reference) |                                                       | 1.00 (Reference) |                             | 1.00 (Reference) |
|       | 95-99               | 6,247,454   | 23,663       | 1,218            | 0.002                              | 1.03 (1.01-1.05) | 0.004                                                 | 1.03 (1.01-1.04) | 0.001                       | 1.03 (1.01-1.05) |
|       | 100-104             | 3,990,176   | 18,171       | 1,240            | <0.001                             | 1.05 (1.03-1.07) | <0.001                                                | 1.05 (1.03-1.07) | <0.001                      | 1.05 (1.03-1.07) |
|       | 105-109             | 2,532,146   | 14,091       | 1,281            | <0.001                             | 1.10 (1.08-1.13) | <0.001                                                | 1.10 (1.08-1.12) | <0.001                      | 1.11 (1.08-1.13) |
|       | 110-117             | 2,092,046   | 14,549       | 1,378            | <0.001                             | 1.19 (1.16-1.21) | <0.001                                                | 1.18 (1.16-1.20) | <0.001                      | 1.19 (1.17-1.22) |
|       | 118-125             | 1,139,956   | 10,031       | 1,419            | <0.001                             | 1.24 (1.21-1.27) | <0.001                                                | 1.23 (1.20-1.26) | <0.001                      | 1.25 (1.22-1.28) |
|       | 126-139             | 675,239     | 6,918        | 1,508            | <0.001                             | 1.31 (1.27-1.34) | <0.001                                                | 1.30 (1.26-1.33) | <0.001                      | 1.31 (1.28-1.35) |
|       | 140-169             | 592,779     | 7,197        | 1,638            | <0.001                             | 1.46 (1.42-1.50) | <0.001                                                | 1.45 (1.41-1.48) | <0.001                      | 1.46 (1.42-1.50) |
|       | 170-200             | 220,660     | 3,148        | 1,880            | <0.001                             | 1.75 (1.68-1.81) | <0.001                                                | 1.73 (1.67-1.80) | <0.001                      | 1.76 (1.70-1.83) |
| ≥200  | 319,093             | 5,356       | 2,253        | <0.001           | 2.25 (2.19-2.32)                   | <0.001           | 2.23 (2.16-2.29)                                      | <0.001           | 2.27 (2.20-2.33)            |                  |

ASR, age standardized death rate per 100,000 person-years; CI, confidence interval; FSG, fasting serum glucose; HR, hazard ratio

<sup>a</sup> HRs were calculated by Cox models stratified by age (baseline age, years: 18-24, 25-34, 35-44, 45-54, 55-64, 65-74, 75-84, 85-99), after adjustment for risk factors.

<sup>b</sup> Adjustment for age at baseline, and sex (if applicable)

<sup>c</sup> Adjustment for age at baseline, sex (if applicable), smoking status, alcohol use, and physical activity.

<sup>d</sup> Adjustment for age at baseline, sex (if applicable), smoking status, alcohol use, physical activity, body mass index, systolic blood pressure, and total cholesterol.

<sup>e</sup> Uniformly age-standardized death rate per 100,000 person-years (namely, the simple mean of calculable age-specific rates in the 14 age-specific rates at ages 18-24 years, and 25-29 years to 85 years or older by 5 years based on attained age during follow-up) was calculated for each FSG category. Several age-specific rates were calculated at each age group, and age-specific rate in the oldest ages at each age group can be very high due to small number of follow-up years. Therefore, death rate at a FSG category can be very high compared to other categories.

To convert glucose from mg/dL to mmol/L, multiply by 0.0555.

**Table S5. HRs<sup>a</sup> for death associated with fasting glucose in men and women, according to age.**

| Age group, years | FSG group, mg/dL | Men<br>(n=7,090,089) |              |                  |                  |                  | Women<br>(n=5,365,272) |              |                  |                  |                  |
|------------------|------------------|----------------------|--------------|------------------|------------------|------------------|------------------------|--------------|------------------|------------------|------------------|
|                  |                  | Person year          | No. of death | ASR <sup>b</sup> | p-value          | HR (95% CI)      | Person year            | No. of death | ASR <sup>b</sup> | p-value          | HR (95% CI)      |
| 18-34            | <65              | 306,809              | 222          | 70               | 0.093            | 1.13 (0.98-1.29) | 226,074                | 68           | 87               | 0.379            | 1.12 (0.87-1.44) |
|                  | 65-69            | 459,120              | 284          | 65               | 0.641            | 0.97 (0.86-1.10) | 357,353                | 105          | 30               | 0.440            | 1.09 (0.88-1.34) |
|                  | 70-74            | 2,510,762            | 1,568        | 72               | 0.689            | 0.99 (0.92-1.05) | 1,846,955              | 568          | 35               | 0.034            | 1.13 (1.01-1.27) |
|                  | 75-79            | 3,430,299            | 2,082        | 77               | 0.159            | 0.96 (0.90-1.02) | 2,522,360              | 753          | 44               | 0.096            | 1.10 (0.98-1.22) |
|                  | 80-84            | 3,741,429            | 2,200        | 78               | 0.010            | 0.92 (0.87-0.98) | 2,783,251              | 769          | 41               | 0.836            | 1.01 (0.91-1.13) |
|                  | 85-89            | 3,932,918            | 2,403        | 71               | 0.149            | 0.96 (0.90-1.02) | 2,727,931              | 808          | 38               | 0.163            | 1.08 (0.97-1.20) |
|                  | 90-94            | 3,379,961            | 2,167        | 73               |                  | 1.00 (Reference) | 2,067,005              | 571          | 33               |                  | 1.00 (Reference) |
|                  | 95-99            | 2,647,841            | 1,658        | 72               | 0.311            | 0.97 (0.91-1.03) | 1,364,378              | 409          | 38               | 0.245            | 1.08 (0.95-1.22) |
|                  | 100-104          | 1,628,404            | 1,104        | 85               | 0.369            | 1.03 (0.96-1.11) | 690,653                | 215          | 31               | 0.212            | 1.11 (0.94-1.29) |
|                  | 105-109          | 1,019,857            | 703          | 91               | 0.441            | 1.03 (0.95-1.13) | 361,706                | 117          | 97               | 0.193            | 1.14 (0.94-1.39) |
|                  | 110-117          | 783,818              | 645          | 97               | <0.001           | 1.21 (1.11-1.32) | 239,403                | 82           | 79               | 0.130            | 1.20 (0.95-1.51) |
|                  | 118-125          | 377,702              | 371          | 69               | <0.001           | 1.41 (1.27-1.58) | 96,713                 | 40           | 37               | 0.028            | 1.43 (1.04-1.98) |
|                  | 126-139          | 199,528              | 194          | 94               | <0.001           | 1.38 (1.19-1.60) | 45,186                 | 18           | 37               | 0.188            | 1.37 (0.86-2.19) |
|                  | 140-169          | 145,001              | 160          | 147              | <0.001           | 1.54 (1.31-1.81) | 31,253                 | 13           | 30               | 0.226            | 1.40 (0.81-2.43) |
|                  | 170-200          | 45,206               | 58           | 81               | <0.001           | 1.77 (1.36-2.30) | 9,405                  | 6            | 76               | 0.074            | 2.08 (0.93-4.66) |
| ≥200             | 65,853           | 143                  | 234          | <0.001           | 3.05 (2.57-3.61) | 15,750           | 21                     | 106          | <0.001           | 4.33 (2.79-6.70) |                  |
| 35-44            | <65              | 169,590              | 311          | 152              | 0.001            | 1.22 (1.09-1.37) | 104,849                | 102          | 105              | 0.018            | 1.27 (1.04-1.56) |
|                  | 65-69            | 276,203              | 394          | 193              | 0.444            | 0.96 (0.87-1.06) | 181,763                | 147          | 62               | 0.486            | 1.06 (0.90-1.26) |
|                  | 70-74            | 1,569,494            | 2,436        | 187              | 0.049            | 1.05 (1.00-1.10) | 1,066,458              | 840          | 96               | 0.405            | 1.04 (0.95-1.13) |
|                  | 75-79            | 2,303,436            | 3,510        | 165              | 0.102            | 1.04 (0.99-1.08) | 1,582,610              | 1,180        | 83               | 0.632            | 0.98 (0.91-1.06) |
|                  | 80-84            | 2,768,741            | 4,135        | 183              | 0.323            | 1.02 (0.98-1.07) | 2,000,243              | 1,494        | 87               | 0.429            | 0.97 (0.90-1.04) |
|                  | 85-89            | 3,187,194            | 4,682        | 179              | 0.816            | 1.00 (0.96-1.05) | 2,232,438              | 1,670        | 97               | 0.337            | 0.97 (0.90-1.04) |
|                  | 90-94            | 3,099,955            | 4,536        | 163              |                  | 1.00 (Reference) | 1,955,557              | 1,537        | 89               |                  | 1.00 (Reference) |
|                  | 95-99            | 2,672,240            | 3,900        | 179              | 0.591            | 0.99 (0.95-1.03) | 1,453,344              | 1,197        | 99               | 0.376            | 1.03 (0.96-1.12) |
|                  | 100-104          | 1,882,498            | 3,117        | 180              | <0.001           | 1.10 (1.05-1.15) | 880,720                | 723          | 99               | 0.781            | 1.01 (0.93-1.11) |
|                  | 105-109          | 1,292,728            | 2,253        | 202              | <0.001           | 1.14 (1.08-1.19) | 514,122                | 446          | 122              | 0.347            | 1.05 (0.95-1.17) |
|                  | 110-117          | 1,092,431            | 2,206        | 252              | <0.001           | 1.28 (1.22-1.35) | 380,449                | 397          | 135              | <0.001           | 1.24 (1.11-1.39) |
|                  | 118-125          | 590,693              | 1,389        | 267              | <0.001           | 1.45 (1.37-1.54) | 176,829                | 204          | 156              | <0.001           | 1.36 (1.17-1.57) |
|                  | 126-139          | 349,425              | 911          | 339              | <0.001           | 1.59 (1.48-1.70) | 88,782                 | 110          | 158              | <0.001           | 1.43 (1.18-1.74) |
|                  | 140-169          | 311,437              | 940          | 358              | <0.001           | 1.80 (1.68-1.93) | 73,018                 | 115          | 207              | <0.001           | 1.79 (1.48-2.16) |
|                  | 170-200          | 124,300              | 435          | 341              | <0.001           | 2.07 (1.88-2.29) | 28,212                 | 36           | 81               | 0.027            | 1.45 (1.04-2.02) |
| ≥200             | 186,795          | 980                  | 576          | <0.001           | 3.11 (2.90-3.33) | 42,988           | 104                    | 308          | <0.001           | 2.78 (2.28-3.40) |                  |
| 45-54            | <65              | 96,440               | 483          | 630              | <0.001           | 1.24 (1.13-1.36) | 90,617                 | 154          | 211              | 0.026            | 1.20 (1.02-1.41) |

| Age group, years | FSG group, mg/dL | Men (n=7,090,089) |              |                  |         |                  | Women (n=5,365,272) |              |                  |         |                  |
|------------------|------------------|-------------------|--------------|------------------|---------|------------------|---------------------|--------------|------------------|---------|------------------|
|                  |                  | Person year       | No. of death | ASR <sup>b</sup> | p-value | HR (95% CI)      | Person year         | No. of death | ASR <sup>b</sup> | p-value | HR (95% CI)      |
|                  | 65-69            | 149,078           | 699          | 627              | <0.001  | 1.19 (1.10-1.29) | 156,721             | 228          | 155              | 0.634   | 1.03 (0.90-1.18) |
|                  | 70-74            | 885,719           | 3,513        | 520              | 0.190   | 1.03 (0.99-1.07) | 918,594             | 1,408        | 168              | 0.003   | 1.10 (1.03-1.17) |
|                  | 75-79            | 1,303,374         | 5,089        | 460              | 0.120   | 1.03 (0.99-1.07) | 1,397,248           | 2,058        | 160              | 0.039   | 1.06 (1.00-1.12) |
|                  | 80-84            | 1,635,948         | 6,306        | 484              | 0.109   | 1.03 (0.99-1.06) | 1,843,369           | 2,656        | 214              | 0.199   | 1.04 (0.98-1.09) |
|                  | 85-89            | 1,946,425         | 7,298        | 449              | 0.643   | 1.01 (0.98-1.04) | 2,147,481           | 3,027        | 172              | 0.760   | 1.01 (0.96-1.06) |
|                  | 90-94            | 1,986,767         | 7,316        | 529              |         | 1.00 (Reference) | 2,025,160           | 2,848        | 181              |         | 1.00 (Reference) |
|                  | 95-99            | 1,807,390         | 6,872        | 499              | 0.037   | 1.04 (1.00-1.07) | 1,604,444           | 2,346        | 177              | 0.340   | 1.03 (0.97-1.08) |
|                  | 100-104          | 1,384,637         | 5,463        | 491              | <0.001  | 1.07 (1.04-1.11) | 1,060,642           | 1,610        | 207              | 0.118   | 1.05 (0.99-1.12) |
|                  | 105-109          | 1,016,017         | 4,370        | 572              | <0.001  | 1.16 (1.11-1.20) | 671,636             | 1,162        | 212              | <0.001  | 1.18 (1.10-1.26) |
|                  | 110-117          | 945,298           | 4,425        | 568              | <0.001  | 1.24 (1.19-1.29) | 546,410             | 1,024        | 203              | <0.001  | 1.25 (1.16-1.34) |
|                  | 118-125          | 551,679           | 2,880        | 636              | <0.001  | 1.35 (1.29-1.41) | 288,293             | 618          | 259              | <0.001  | 1.41 (1.29-1.54) |
|                  | 126-139          | 357,630           | 2,108        | 753              | <0.001  | 1.50 (1.43-1.58) | 166,916             | 342          | 190              | <0.001  | 1.32 (1.18-1.48) |
|                  | 140-169          | 345,020           | 2,359        | 858              | <0.001  | 1.71 (1.63-1.79) | 142,127             | 336          | 388              | <0.001  | 1.51 (1.35-1.69) |
|                  | 170-200          | 148,950           | 1,141        | 1,034            | <0.001  | 1.89 (1.78-2.01) | 54,534              | 158          | 363              | <0.001  | 1.86 (1.58-2.18) |
|                  | ≥200             | 218,154           | 2,370        | 1,356            | <0.001  | 2.70 (2.58-2.83) | 82,138              | 373          | 548              | <0.001  | 2.91 (2.61-3.24) |
| 55-64            | <65              | 60,126            | 894          | 1,889            | <0.001  | 1.25 (1.17-1.34) | 58,581              | 294          | 585              | 0.008   | 1.17 (1.04-1.32) |
|                  | 65-69            | 87,952            | 1,197        | 2,124            | <0.001  | 1.18 (1.11-1.25) | 95,019              | 430          | 770              | 0.196   | 1.07 (0.97-1.18) |
|                  | 70-74            | 508,796           | 6,158        | 1,757            | <0.001  | 1.08 (1.05-1.12) | 529,392             | 2,218        | 763              | 0.262   | 1.03 (0.98-1.08) |
|                  | 75-79            | 728,245           | 8,311        | 1,705            | 0.003   | 1.04 (1.01-1.07) | 804,431             | 3,380        | 693              | 0.091   | 1.04 (0.99-1.08) |
|                  | 80-84            | 932,736           | 10,131       | 1,611            | 0.264   | 1.02 (0.99-1.04) | 1,094,876           | 4,532        | 573              | 0.080   | 1.04 (1.00-1.08) |
|                  | 85-89            | 1,112,916         | 11,625       | 1,532            | 0.348   | 0.99 (0.96-1.01) | 1,328,291           | 5,321        | 609              | 0.812   | 1.00 (0.97-1.04) |
|                  | 90-94            | 1,139,320         | 11,838       | 1,523            |         | 1.00 (Reference) | 1,314,640           | 5,213        | 632              |         | 1.00 (Reference) |
|                  | 95-99            | 1,059,488         | 11,058       | 1,551            | 0.163   | 1.02 (0.99-1.05) | 1,122,375           | 4,635        | 646              | 0.065   | 1.04 (1.00-1.08) |
|                  | 100-104          | 839,922           | 8,964        | 1,665            | <0.001  | 1.05 (1.02-1.08) | 813,453             | 3,454        | 638              | 0.011   | 1.06 (1.01-1.10) |
|                  | 105-109          | 639,512           | 7,087        | 1,490            | <0.001  | 1.09 (1.06-1.12) | 575,612             | 2,659        | 715              | <0.001  | 1.14 (1.09-1.20) |
|                  | 110-117          | 626,003           | 7,486        | 1,878            | <0.001  | 1.17 (1.13-1.20) | 519,922             | 2,500        | 702              | <0.001  | 1.17 (1.12-1.23) |
|                  | 118-125          | 398,717           | 5,285        | 1,833            | <0.001  | 1.28 (1.24-1.33) | 306,926             | 1,635        | 726              | <0.001  | 1.28 (1.21-1.35) |
|                  | 126-139          | 269,932           | 3,934        | 1,999            | <0.001  | 1.41 (1.36-1.46) | 194,409             | 1,117        | 1,015            | <0.001  | 1.38 (1.29-1.47) |
|                  | 140-169          | 262,647           | 4,395        | 2,454            | <0.001  | 1.61 (1.55-1.66) | 175,620             | 1,134        | 939              | <0.001  | 1.54 (1.44-1.64) |
|                  | 170-200          | 112,257           | 2,089        | 2,608            | <0.001  | 1.78 (1.70-1.87) | 65,686              | 531          | 1,070            | <0.001  | 1.92 (1.75-2.10) |
|                  | ≥200             | 154,574           | 3,826        | 3,296            | <0.001  | 2.38 (2.30-2.47) | 94,390              | 1,081        | 1,664            | <0.001  | 2.70 (2.53-2.88) |
| 65-74            | <65              | 32,275            | 1,371        | 5,773            | <0.001  | 1.23 (1.17-1.30) | 33,915              | 634          | 2,788            | <0.001  | 1.22 (1.12-1.32) |
|                  | 65-69            | 43,811            | 1,594        | 5,319            | 0.003   | 1.08 (1.03-1.14) | 51,411              | 868          | 3,212            | <0.001  | 1.13 (1.06-1.21) |
|                  | 70-74            | 233,268           | 8,217        | 5,975            | <0.001  | 1.08 (1.05-1.11) | 283,168             | 4,387        | 3,296            | 0.001   | 1.06 (1.02-1.10) |
|                  | 75-79            | 320,489           | 10,643       | 6,053            | 0.002   | 1.04 (1.02-1.07) | 404,590             | 6,130        | 2,752            | 0.003   | 1.05 (1.02-1.09) |

| Age group, years | FSG group, mg/dL | Men<br>(n=7,090,089) |              |                  |         |                  | Women<br>(n=5,365,272) |              |                  |         |                  |
|------------------|------------------|----------------------|--------------|------------------|---------|------------------|------------------------|--------------|------------------|---------|------------------|
|                  |                  | Person year          | No. of death | ASR <sup>b</sup> | p-value | HR (95% CI)      | Person year            | No. of death | ASR <sup>b</sup> | p-value | HR (95% CI)      |
|                  | 80-84            | 410,628              | 13,109       | 5,188            | 0.052   | 1.02 (1.00-1.05) | 538,223                | 7,868        | 2,751            | 0.048   | 1.03 (1.00-1.06) |
|                  | 85-89            | 484,597              | 15,149       | 5,006            | 0.191   | 1.02 (0.99-1.04) | 650,456                | 9,172        | 2,522            | 0.908   | 1.00 (0.97-1.03) |
|                  | 90-94            | 489,806              | 14,769       | 4,623            |         | 1.00 (Reference) | 658,325                | 9,215        | 2,528            |         | 1.00 (Reference) |
|                  | 95-99            | 444,095              | 13,535       | 5,063            | 0.056   | 1.02 (1.00-1.05) | 578,920                | 8,358        | 2,685            | 0.065   | 1.03 (1.00-1.06) |
|                  | 100-104          | 363,336              | 11,224       | 5,776            | <0.001  | 1.05 (1.02-1.07) | 444,396                | 6,704        | 2,657            | <0.001  | 1.07 (1.04-1.11) |
|                  | 105-109          | 275,076              | 8,877        | 5,281            | <0.001  | 1.10 (1.07-1.13) | 329,784                | 5,200        | 2,340            | <0.001  | 1.11 (1.07-1.15) |
|                  | 110-117          | 274,607              | 9,322        | 5,365            | <0.001  | 1.16 (1.13-1.19) | 323,508                | 5,564        | 2,914            | <0.001  | 1.21 (1.17-1.25) |
|                  | 118-125          | 180,539              | 6,517        | 6,620            | <0.001  | 1.23 (1.19-1.27) | 211,542                | 3,853        | 2,961            | <0.001  | 1.27 (1.22-1.32) |
|                  | 126-139          | 124,836              | 4,703        | 5,525            | <0.001  | 1.31 (1.26-1.35) | 139,122                | 2,684        | 3,196            | <0.001  | 1.35 (1.30-1.41) |
|                  | 140-169          | 121,154              | 5,162        | 6,545            | <0.001  | 1.45 (1.41-1.50) | 131,553                | 2,828        | 3,733            | <0.001  | 1.50 (1.44-1.56) |
|                  | 170-200          | 47,681               | 2,281        | 5,378            | <0.001  | 1.66 (1.58-1.73) | 48,973                 | 1,310        | 4,146            | <0.001  | 1.88 (1.77-1.99) |
|                  | ≥200             | 60,670               | 3,505        | 9,283            | <0.001  | 2.05 (1.97-2.12) | 65,743                 | 2,141        | 4,975            | <0.001  | 2.32 (2.21-2.43) |
| 75-99            | <65              | 5,941                | 639          | 10,912           | <0.001  | 1.19 (1.10-1.29) | 7,739                  | 463          | 5,708            | 0.307   | 1.05 (0.96-1.15) |
|                  | 65-69            | 9,263                | 861          | 9,026            | 0.375   | 1.03 (0.96-1.11) | 11,275                 | 696          | 5,906            | 0.006   | 1.11 (1.03-1.20) |
|                  | 70-74            | 45,279               | 4,292        | 9,418            | 0.001   | 1.07 (1.03-1.11) | 61,044                 | 3,497        | 5,471            | 0.040   | 1.04 (1.00-1.09) |
|                  | 75-79            | 61,539               | 5,636        | 9,088            | 0.004   | 1.05 (1.02-1.09) | 86,597                 | 4,768        | 5,265            | 0.557   | 1.01 (0.97-1.05) |
|                  | 80-84            | 77,124               | 6,656        | 8,476            | 0.355   | 0.98 (0.95-1.02) | 112,432                | 6,086        | 5,163            | 0.805   | 1.00 (0.96-1.03) |
|                  | 85-89            | 92,936               | 7,830        | 8,278            | 0.098   | 0.97 (0.94-1.00) | 134,749                | 7,231        | 5,087            | 0.882   | 1.00 (0.97-1.04) |
|                  | 90-94            | 92,919               | 7,880        | 8,335            |         | 1.00 (Reference) | 135,939                | 7,314        | 5,090            |         | 1.00 (Reference) |
|                  | 95-99            | 83,813               | 6,989        | 8,195            | 0.356   | 0.98 (0.95-1.02) | 123,993                | 6,718        | 5,130            | 0.356   | 1.02 (0.98-1.05) |
|                  | 100-104          | 66,369               | 5,811        | 8,609            | 0.011   | 1.04 (1.01-1.08) | 100,311                | 5,465        | 5,154            | 0.299   | 1.02 (0.98-1.06) |
|                  | 105-109          | 52,411               | 4,690        | 8,823            | <0.001  | 1.08 (1.04-1.12) | 79,286                 | 4,507        | 5,386            | 0.003   | 1.06 (1.02-1.10) |
|                  | 110-117          | 52,459               | 4,874        | 9,201            | <0.001  | 1.12 (1.08-1.16) | 82,354                 | 4,982        | 5,729            | <0.001  | 1.14 (1.10-1.18) |
|                  | 118-125          | 37,039               | 3,620        | 9,754            | <0.001  | 1.17 (1.12-1.22) | 59,653                 | 3,681        | 5,830            | <0.001  | 1.16 (1.11-1.20) |
|                  | 126-139          | 24,674               | 2,542        | 10,184           | <0.001  | 1.26 (1.20-1.31) | 40,823                 | 2,647        | 6,115            | <0.001  | 1.22 (1.16-1.27) |
|                  | 140-169          | 24,532               | 2,725        | 11,063           | <0.001  | 1.33 (1.27-1.39) | 39,208                 | 2,771        | 6,758            | <0.001  | 1.35 (1.30-1.42) |
|                  | 170-200          | 9,333                | 1,084        | 11,687           | <0.001  | 1.45 (1.36-1.54) | 13,850                 | 1,107        | 7,713            | <0.001  | 1.56 (1.46-1.66) |
|                  | ≥200             | 10,987               | 1,383        | 12,852           | <0.001  | 1.64 (1.54-1.73) | 18,083                 | 1,636        | 8,976            | <0.001  | 1.85 (1.75-1.95) |

ASR, age standardized death rate per 100,000 person-years; CI, confidence interval; FSG, fasting serum glucose; HR, hazard ratio

<sup>a</sup> HRs were calculated by Cox models stratified by age (baseline age, years: 18-24, 25-34, 35-44, 45-54, 55-64, 65-74, 75-84, 85-99), after adjustment for age at baseline, sex (if applicable), smoking status, alcohol use, physical activity, body mass index, systolic blood pressure, and total cholesterol.

<sup>b</sup> Uniformly age-standardized death rate per 100,000 person-years (namely, the simple mean of calculable age-specific rates in the 14 age-specific rates at ages 18-24 years, and 25-29 years to 85 years or older by 5 years based on attained age during follow-up) was calculated for each FSG category. Several age-specific rates were calculated at each age group, and age-specific rate in the oldest ages at each age group can be very high due to small number of follow-up years. Therefore, death rate at a FSG category can be very high compared to other categories.

To convert glucose from mg/dL to mmol/L, multiply by 0.0555.

**Table S6. HRs<sup>a</sup> for death associated with four categories of fasting glucose**

| Age group, years | FSG group, mg/dL | ADA classification |                  |                  |                  |                  |                  |                  |                  | WHO classification |  |  |
|------------------|------------------|--------------------|------------------|------------------|------------------|------------------|------------------|------------------|------------------|--------------------|--|--|
|                  |                  | Men and women      |                  | Men              |                  | Women            |                  | FSG group, mg/dL | Men and women    |                    |  |  |
|                  |                  | p-value            | HR (95% CI)      | p-value          | HR (95% CI)      | p-value          | HR (95% CI)      |                  | p-value          | HR (95% CI)        |  |  |
| 18-99            | <70              | <0.001             | 1.12 (1.11-1.14) | <0.001           | 1.13 (1.11-1.16) | <0.001           | 1.10 (1.07-1.14) | <70              | <0.001           | 1.11 (1.09-1.13)   |  |  |
| all ages         | 70-99            | 1.00 (Reference)   |                  | 1.00 (Reference) |                  | 1.00 (Reference) |                  | 70-109           | 1.00 (Reference) |                    |  |  |
| combined         | 100-125          | <0.001             | 1.12 (1.11-1.13) | <0.001           | 1.12 (1.11-1.12) | <0.001           | 1.11 (1.10-1.12) | 110-125          | <0.001           | 1.19 (1.18-1.20)   |  |  |
|                  | ≥126             | <0.001             | 1.60 (1.59-1.61) | <0.001           | 1.61 (1.59-1.62) | <0.001           | 1.54 (1.52-1.57) | ≥126             | <0.001           | 1.58 (1.57-1.59)   |  |  |
| 18-34            | <70              | 0.102              | 1.07 (0.99-1.15) | 0.120            | 1.07 (0.98-1.17) | 0.675            | 1.03 (0.89-1.20) | <70              | 0.145            | 1.06 (0.98-1.14)   |  |  |
|                  | 70-99            | 1.00 (Reference)   |                  | 1.00 (Reference) |                  | 1.00 (Reference) |                  | 70-109           | 1.00 (Reference) |                    |  |  |
|                  | 100-125          | <0.001             | 1.14 (1.10-1.18) | <0.001           | 1.15 (1.10-1.20) | 0.103            | 1.08 (0.98-1.20) | 110-125          | <0.001           | 1.30 (1.22-1.38)   |  |  |
|                  | ≥126             | <0.001             | 1.77 (1.63-1.92) | <0.001           | 1.77 (1.63-1.93) | <0.001           | 1.81 (1.39-2.35) | ≥126             | <0.001           | 1.76 (1.62-1.91)   |  |  |
| 35-44            | <70              | 0.029              | 1.07 (1.01-1.15) | 0.235            | 1.05 (0.97-1.13) | 0.032            | 1.15 (1.01-1.30) | <70              | 0.079            | 1.06 (0.99-1.13)   |  |  |
|                  | 70-99            | 1.00 (Reference)   |                  | 1.00 (Reference) |                  | 1.00 (Reference) |                  | 70-109           | 1.00 (Reference) |                    |  |  |
|                  | 100-125          | <0.001             | 1.17 (1.14-1.20) | <0.001           | 1.18 (1.15-1.21) | <0.001           | 1.11 (1.05-1.17) | 110-125          | <0.001           | 1.30 (1.26-1.34)   |  |  |
|                  | ≥126             | <0.001             | 1.96 (1.90-2.03) | <0.001           | 1.98 (1.91-2.06) | <0.001           | 1.80 (1.62-2.00) | ≥126             | <0.001           | 1.93 (1.87-2.00)   |  |  |
| 45-54            | <70              | <0.001             | 1.16 (1.10-1.22) | <0.001           | 1.19 (1.12-1.26) | 0.238            | 1.06 (0.96-1.18) | <70              | <0.001           | 1.14 (1.08-1.20)   |  |  |
|                  | 70-99            | 1.00 (Reference)   |                  | 1.00 (Reference) |                  | 1.00 (Reference) |                  | 70-109           | 1.00 (Reference) |                    |  |  |
|                  | 100-125          | <0.001             | 1.15 (1.13-1.17) | <0.001           | 1.15 (1.13-1.17) | <0.001           | 1.13 (1.10-1.17) | 110-125          | <0.001           | 1.24 (1.21-1.27)   |  |  |
|                  | ≥126             | <0.001             | 1.82 (1.78-1.86) | <0.001           | 1.84 (1.79-1.88) | <0.001           | 1.69 (1.59-1.79) | ≥126             | <0.001           | 1.79 (1.75-1.83)   |  |  |
| 55-64            | <70              | <0.001             | 1.16 (1.12-1.20) | <0.001           | 1.19 (1.14-1.24) | 0.033            | 1.08 (1.01-1.17) | <70              | <0.001           | 1.15 (1.11-1.19)   |  |  |
|                  | 70-99            | 1.00 (Reference)   |                  | 1.00 (Reference) |                  | 1.00 (Reference) |                  | 70-109           | 1.00 (Reference) |                    |  |  |
|                  | 100-125          | <0.001             | 1.11 (1.10-1.12) | <0.001           | 1.11 (1.09-1.12) | <0.001           | 1.11 (1.09-1.14) | 110-125          | <0.001           | 1.18 (1.16-1.20)   |  |  |
|                  | ≥126             | <0.001             | 1.69 (1.66-1.72) | <0.001           | 1.68 (1.65-1.71) | <0.001           | 1.70 (1.64-1.76) | ≥126             | <0.001           | 1.67 (1.64-1.70)   |  |  |
| 65-74            | <70              | <0.001             | 1.13 (1.10-1.16) | <0.001           | 1.12 (1.08-1.16) | <0.001           | 1.14 (1.08-1.20) | <70              | <0.001           | 1.12 (1.09-1.15)   |  |  |
|                  | 70-99            | 1.00 (Reference)   |                  | 1.00 (Reference) |                  | 1.00 (Reference) |                  | 70-109           | 1.00 (Reference) |                    |  |  |
|                  | 100-125          | <0.001             | 1.10 (1.09-1.12) | <0.001           | 1.09 (1.08-1.11) | <0.001           | 1.12 (1.10-1.14) | 110-125          | <0.001           | 1.17 (1.15-1.18)   |  |  |
|                  | ≥126             | <0.001             | 1.53 (1.51-1.55) | <0.001           | 1.49 (1.46-1.52) | <0.001           | 1.59 (1.56-1.63) | ≥126             | <0.001           | 1.52 (1.49-1.54)   |  |  |
| 75-99            | <70              | <0.001             | 1.09 (1.05-1.13) | 0.001            | 1.09 (1.03-1.15) | 0.011            | 1.08 (1.02-1.14) | <70              | <0.001           | 1.08 (1.04-1.12)   |  |  |
|                  | 70-99            | 1.00 (Reference)   |                  | 1.00 (Reference) |                  | 1.00 (Reference) |                  | 70-109           | 1.00 (Reference) |                    |  |  |
|                  | 100-125          | <0.001             | 1.08 (1.07-1.10) | <0.001           | 1.09 (1.07-1.11) | <0.001           | 1.08 (1.06-1.09) | 110-125          | <0.001           | 1.13 (1.11-1.15)   |  |  |
|                  | ≥126             | <0.001             | 1.38 (1.36-1.40) | <0.001           | 1.36 (1.33-1.39) | <0.001           | 1.39 (1.36-1.43) | ≥126             | <0.001           | 1.37 (1.34-1.39)   |  |  |

ADA, American Diabetes Association; CI, confidence interval; FSG, fasting serum glucose; HR, hazard ratio

<sup>a</sup> HRs were calculated by Cox models stratified by age (baseline age, years: 18-24, 25-34, 35-44, 45-54, 55-64, 65-74, 75-84, 85-99), after adjustment for age at baseline, sex (if applicable), smoking status, alcohol use, physical activity, body mass index, systolic blood pressure, and total cholesterol.

To convert glucose from mg/dL to mmol/L, multiply by 0.0555.
